# Supplementary material for: Possibility of spin-polarized transport in edge fluorinated armchair boron nitride nanoribbons
Source: Royal Society of Chemistry journal article supplement (doi:10.1039/c5ra21832b), 2016-01-01
Supplement: c5ra21832b1.pdf [file c5ra21832b1.pdf]

## Supplementary Information

# Possibility of Spin-polarized Transport in Edge Fluorinated Armchair Boron Nitride Nanoribbons

Hari Mohan Rai<sup>\*1</sup>, Shailendra K. Saxena<sup>1</sup>, Vikash Mishra<sup>1</sup>, Ravikiran Late<sup>1</sup>, Rajesh Kumar<sup>1</sup>,  
Pankaj R. Sagdeo<sup>1</sup>, Neeraj K. Jaiswal<sup>2</sup> and Pankaj Srivastava<sup>3</sup>

<sup>1</sup>Material Research Lab. (MRL), Indian Institute of Technology Indore, Indore (M.P.) – 452017, India

<sup>2</sup>PDPM- Indian Institute of Information Technology, Design and Manufacturing, Jabalpur – 482005, India

<sup>3</sup>Computational Nanoscience and Technology Lab. (CNTL),

ABV- Indian Institute of Information Technology and Management, Gwalior – 474015, India

\* Corresponding author: [pankajs@iiitm.ac.in](mailto:pankajs@iiitm.ac.in)

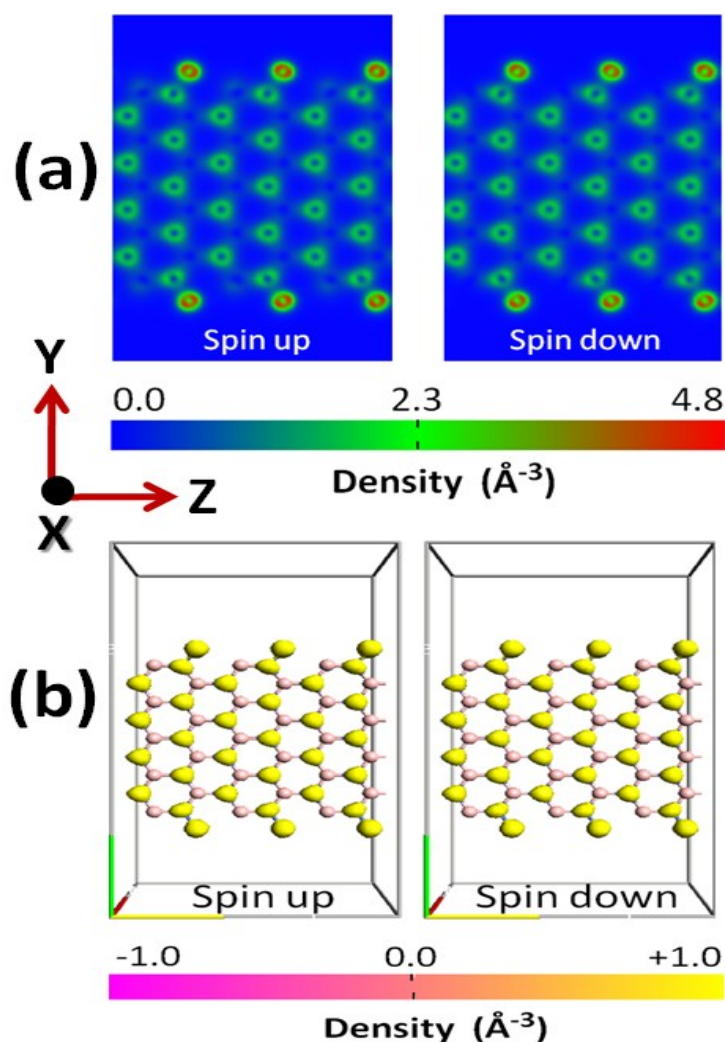

**Fig. S1:** (Color online). The real space distribution of calculated electron densities corresponding to spin up and spin down electrons for 9-ABNNR<sub>FN</sub> is presented in the form of (a) Contour and

(b) Isosurface. The corresponding density scale is shown by a tricolored rectangular horizontal strip situated at the bottom. In figure (b), the electron density is plotted corresponding to isovalue 1 (au). In order to display the distinct change (if any) between spin up and spin down electron densities at ribbon edges, ribbon configurations are not shown in figure (a). B, N and F atoms are same in shape, size and color as that of represented in figure 1. The ABNNRs are modeled with periodic boundary conditions along  $z$ - axis whereas  $x$  and  $y$  directions are confined.

We found that the fluorination of the zigzag ribbons is energetically more favorable than that of the ABNNRs. The calculated values for the ribbons with fluorinated zigzag edges are given below for comparison with edge-fluorinated ABNNRs (tabulated in main text).

**Table S1:** Calculated **cohesive energy  $E_c$**  (eV) as a function of ribbon width for fluorinated ZBNNR structures.

| Ribbon width $N_z$ | $E_c$ (eV)          |                      |                     |
|--------------------|---------------------|----------------------|---------------------|
|                    | ZBNNR <sub>FB</sub> | ZBNNR <sub>FBN</sub> | ZBNNR <sub>FN</sub> |
| 6                  | -9.588              | -9.305               | -9.283              |
| 8                  | -9.734              | -9.506               | -9.501              |
| 10                 | -9.825              | -9.634               | -9.636              |

**Table S2:** Calculated **binding energy  $E_B$**  (eV) per F-atoms a function of ribbon width for fluorinated ZBNNR structures.

| Ribbon width $N_z$ | $E_B$ (eV)          |                      |                     |
|--------------------|---------------------|----------------------|---------------------|
|                    | ZBNNR <sub>FB</sub> | ZBNNR <sub>FBN</sub> | ZBNNR <sub>FN</sub> |
| 6                  | -9.450              | -7.535               | -5.483              |
| 8                  | -9.479              | -7.551               | -5.511              |
| 10                 | -9.495              | -7.558               | -5.527              |
